# Supplementary material for: Increased autophagy blocks HER2-mediated breast tumorigenesis
Source: PubMed Central journal article supplement — Proc Natl Acad Sci U S A. 2018 Apr 2;115(16):4176–81. doi: 10.1073/pnas.1717800115 (PMC5910832; doi:10.1073/pnas.1717800115), 2018-04-02
Supplement: pnas.201717800SI.pdf [file pnas.201717800SI.pdf]

# Supporting Information

Vega-Rubín-de-Celis et al. 10.1073/pnas.1717800115

## SI Materials and Methods

**Antibodies and Reagents.** Lapaninib and torin1 were purchased from LC Laboratories. Baf A1 was purchased from Acros (Thermo Scientific). Chloroquine was purchased from Sigma. Antibodies were purchased from the following sources and used at the indicated dilutions: HER2 (no. 2165, 1:1,000 dilution; Cell Signaling), p-HER2 (Y1221/1222) (no. 2243, 1:1,000 dilution; Cell Signaling), p-S6 (S240/244) (no. 2215, 1:1,000 dilution; Cell Signaling), Flag [F1804, 1 µg/mg of protein for immunoprecipitation (IP); Sigma], Flag-HRP (A8592, 1:2,000 dilution; Sigma), total p-tyrosine (sc-7099, 1:1,000 dilution; Santa Cruz Biotechnology), actin-HRP (sc-47778, 1:2,000 dilution; Santa Cruz Biotechnology), Beclin 1 [sc-48341, used for IP at 1 µg of antibody per mg of total protein; sc-11427, used for Western blot (WB), 1:1,000 dilution; Santa Cruz Biotechnology], normal IgG (sc-2025, used for IP at 1 µg of antibody per mg of total protein; Santa Cruz Biotechnology), Bcl-2 (sc-7382, used for WB at 1:100 dilution and IP-WB at 1:500 dilution; Santa Cruz Biotechnology), p62 (GP62-C, 1:2,000 dilution; Progen), and LC3B (NB100-2220, 1:2,000 dilution; Novus Biologicals). Tat-Beclin 1 (YGRKKRRQRRR-GG-VWNATFHIWHD) and Tat-Scrambled (YGRKKRRQRRR-GG-WNHADHTFVWI) were synthesized by the University of Texas Southwestern Protein Technology Center as reported elsewhere (1).

**Mouse Strains and Breeding.** FVB/N-Tg (MMTVneu) 202 Mul/J mice were obtained from The Jackson Laboratory (002376). C57/B6 *Becn1* knock-in *Becn1*<sup>F121A</sup> mice were generated as described (2). MMTVneu mice were crossed with *Becn1*<sup>F121A/F121A</sup> mice to generate MMTV/neu transgenic; *Becn1*<sup>F121A/WT</sup> mice. These mice were intercrossed, and offspring were monitored for tumor development weekly by mammary gland palpation. *Becn1*<sup>WT</sup> and *Becn1*<sup>F121A</sup> mice were crossed with GFP-LC3 transgenic mice (3), and mammary glands of the *Becn1*<sup>WT</sup>:GFP-LC3 and *Becn1*<sup>F121A</sup>:GFP-LC3 mice were analyzed for autophagy. Five- to 6-wk-old female *nu/nu* mice were obtained from Taconic Farms.

**Plasmids.** The pBabe-puromycin-HER2 plasmids [WT, KA (A775\_G776insYVMA), and KD (D845A)] were obtained from Addgene. The pBabe-GFP-LC3 and pCR3.1-Flag-Beclin 1 plasmids were previously reported (4).

**siRNA and Plasmid Transfection.** Plasmid transfections were performed using Lipofectamine 2000 (Invitrogen) according to the manufacturer's instructions. Human Dicer-siRNA for HER2 and nontargeting control were obtained from Integrated DNA Technologies, and transfected with Lipofectamine RNAiMax (Invitrogen) according to the manufacturer's instructions.

**Cell Lysates, IP, and WB Analyses.** Cells were washed in ice-cold PBS and lysed in lysis buffer [50 mM Tris-HCl (pH 7.4), 250 mM NaCl, 0.5% Igepal] with proteases (Roche) and phosphatases (Thermo Scientific) inhibitor mixtures for 10 min at 4 °C. Lysates were centrifuged at 16,000 × g for 10 min. Cleared lysates were diluted in 2× SDS/PAGE loading buffer (Bio-Rad) and boiled for 10 min. The resulting samples were separated on a 5–20% gradient gel (Bio-Rad), transferred to nitrocellulose membranes (Bio-Rad), and incubated with the indicated antibodies.

For Flag and endogenous Beclin 1 IPs, cells were lysed and processed as above using IP buffer [50 mM Tris-HCl (pH 7.4), 150 mM NaCl, 0.5% Nonidet P-40]. Lysates were precleared using 30 µL of protein-G Sepharose beads (1:1 in IP buffer; Invitrogen) for 2 h. Samples were incubated with anti-Flag or

anti-Beclin 1 antibody (or corresponding IgG controls) overnight at 4 °C. Thirty microliters of Protein-G Sepharose beads were added and incubated for 1 h. Immunoprecipitates were washed three times in IP buffer, resuspended in 2× SDS/PAGE loading buffer, boiled for 5 min, and analyzed by WB.

For Bcl-2 IPs of mammary glands, flash-frozen mammary glands were weighed and homogenized in ice-cold lysis buffer (25 mM Hepes, 150 mM NaCl, 1 mM EDTA, 1% TX100; 1 mL per 100 mg of tissue) containing protease and phosphatase inhibitors for 30 min at 4 °C. Lysates were cleared using QIAshredder columns (Qiagen) and further centrifugation (16,000 × g at 4 °C for 30 min). Lysates were precleared with 60 µL of protein-G agarose beads for 2 h and incubated overnight with Bcl-2-agarose (or IgG) antibody. Immunoprecipitates were washed five times, resuspended in 2× SDS/PAGE loading buffer, boiled for 5 min, and analyzed by WB.

For IP of xenograft tumor samples, flash-frozen tumor samples were weighed, diluted in three volumes of IP buffer, and homogenized. Samples were lysed for 30 min at 4 °C and cleared with QIAshredder columns and centrifugation (16,000 × g for 10 min at 4 °C).

**Electron Microscopy.** Tumor tissue was cut into 1-mm<sup>3</sup> pieces and fixed with 2.5% (vol/vol) glutaraldehyde in 0.1 M sodium cacodylate buffer. Tissue samples were then rinsed in 0.1 M sodium cacodylate buffer and postfixed in 1% osmium tetroxide and 0.8% potassium ferricyanide in 0.1 M sodium cacodylate buffer for 1.5 h at room temperature. After three rinses in water, they were stained en bloc with 4% uranyl acetate in 50% ethanol for 2 h. Next, they were dehydrated with increasing concentrations of ethanol, transitioned into resin with propylene oxide, infiltrated with Embed-812 resin, and polymerized in a 60 °C oven overnight. Blocks were sectioned with a diamond knife (Diatome) on a Leica Ultracut 6-µL tramicrotome (Leica Microsystems) and collected onto copper grids, they were then poststained with 2% aqueous uranyl acetate and lead citrate. Images were acquired on a JEOL JEM 1200 EX II transmission electron microscope using a voltage of 120 kV.

Autophagy induction in xenografts was measured by the presence of autophagosomes and autolysosomes at the ultrastructural level. Double-membrane vesicles filled with cytoplasmic portions were categorized as autophagosomes, while double-membrane vacuoles with inner membrane rupture or partial degradation of their contents were classified as autolysosomes. More than 50 cell profiles were analyzed per sample, and the average value for each xenograft was calculated.

**RNAseq Analyses.** RNAseq analyses were performed by Admera Health. Total RNA was extracted from 30 mg of flash-frozen xenograft tumors using a QIAGEN RNeasy PLUS Universal Kit according to the manufacturer's instructions. The RNA quality check was performed using RNA Bioanalyzer chips. A cDNA library was constructed using a NEBNext Ultra RNA Library Prep Kit, and ribosomal RNA depletion was performed with a Ribo-Zero Gold rRNA Removal Kit (Illumina). Sequencing was performed with NextSeq High-Output 2x75. An NGS QC Toolkit (v2.3.1) (5) was used to assess the sequencing quality of the raw reads, and reads that did not pass the default filter were removed. The quality-filtered reads were mapped to the human reference genome (GRCh38) using TopHat (v2.0.8) (6). An HTSeq Python package (0.6.1) (7) was used to generate read counts. Data normalization and sample comparison were

then performed using the DESeq R Bioconductor package (8), and the differentially expressed genes were selected using the false discovery rate-adjusted *P* value cutoff of 0.05. Pathway analysis was performed using ConsensusPathDB (9) for gene set overrepresentation analysis.

**Xenograft and Mouse Experiments.** Six- to 7-wk-old female *Nu/Nu* mice (Taconic Farms) were injected with 60-d, slow-release, 1.7-mg estrogen pellets (Innovative Research of America). Two days later,  $10^7$  BT-474-VH2 cells were injected into the upper right mammary pad. Tumor volume was measured twice a week, and treatments were started when tumor volume reached 200 mm<sup>3</sup>. Mice were randomly distributed and treated with daily i.p. injections of the following agents: Tat-Scrambled and Tat-Becn1 (16 mg·kg<sup>-1</sup>, diluted in PBS), lapatinib (100 mg·kg<sup>-1</sup>, diluted from a DMSO stock in vehicle containing 5% PEG, 5% Tween 80, 5% dextrose in water), or vehicle alone. Following treatment initiation, tumor volume was monitored daily. At the end of the experiment, tumors were harvested and fixed in 4% paraformaldehyde (PFA) for histopathological and ultrastructural analyses or flash-frozen in liquid nitrogen for biochemical and RNAseq analyses.

All mouse experiments were performed in accordance with approved institutional animal care and use protocols of the University of Texas Southwestern Medical Center.

**Autophagy Analyses.** Autophagic activity was measured in HeLa cells and cultured breast cancer cells by WB analysis of p62 and LC3 or by microscopic quantification of GFP-LC3 puncta (autophagosome numbers) in the absence or presence of 100 nM Baf A1 as described elsewhere (10). For measurement of GFP-LC3 puncta, cells were seeded in four-well chamber slides (Lab-Tek) after GFP-LC3 transfection, incubated with the desired treatments, and fixed in 3.6% PFA in PBS for 20 min at room

temperature. Cells were permeabilized in 0.05% saponin and 0.2% BSA in PBS for 15 min at room temperature and blocked in 3% BSA for 1 h at room temperature. Images were acquired at a 20× magnification on a Zeiss AxioImager Z2 microscope. AutoDeBlur and Imaris (Bitplane) were used for Z-stack deconvolution.

Autophagy was measured *in vivo* in the mammary glands of 2-mo-old homozygous *Becn1*<sup>F121A</sup>;GFP-LC3 or *Becn1*<sup>WT</sup>;GFP-LC3 mice (three mice per group) treated with either PBS or chloroquine (50 mg·kg<sup>-1</sup>) for 4 h and perfused in 4% PFA in PBS. The total number of GFP-LC3 dots was counted per duct area. All ducts in the slide were quantified (>50 per mammary gland), and the average value for each mammary gland was determined.

**Histopathological Analyses.** Xenografts tumors were fixed in 4% PFA in PBS, embedded in paraffin, and sectioned. Sections were stained with an anti-Ki67 antibody (1:200; Abcam) or processed for TUNEL labeling (ApoTag; Millipore) according to the manufacturer's instructions.

**METABRIC Breast Cancer Dataset Analyses.** The METABRIC dataset, as described elsewhere (11), was used for all analyses. mRNA expression was measured using the Illumina HT-12 platform, and a Gaussian mixture method-based model was used as described (12) to determine the cutoff between HER2 overexpression and non-overexpressed HER2. The copy number profile was measured using the Affymetrix SNP6 array and processed using the GISTIC 2.0 method algorithm (13) to classify patients as having net loss, diploid, or net gain for the genes *BECN1* and *ERBB2/HER2*. The entire dataset consisted of 2,433 patients, and patients for whom HER2 expression or copy number data were unavailable were excluded from analysis. Survival curves were estimated by the Kaplan–Meier method, and statistical significance between groups determined by the log-rank test.

- Peraro L, et al. (2017) Diversity-oriented stapling yields intrinsically cell-penetrant inducers of autophagy. *J Am Chem Soc* 139:7792–7802.
- Rocchi A, et al. (2017) A *Becn1* mutation mediates hyperactive autophagic sequestration of amyloid oligomers and improved cognition in Alzheimer's disease. *PLoS Genet* 13:e1006962.
- Mizushima N, Yamamoto A, Matsui M, Yoshimori T, Ohsumi Y (2004) In vivo analysis of autophagy in response to nutrient starvation using transgenic mice expressing a fluorescent autophagosome marker. *Mol Biol Cell* 15:1101–1111.
- Wei Y, et al. (2013) EGFR-mediated Beclin 1 phosphorylation in autophagy suppression, tumor progression, and tumor chemoresistance. *Cell* 154:1269–1284.
- Patel RK, Jain M (2012) NGS QC Toolkit: A toolkit for quality control of next generation sequencing data. *PLoS ONE*, 7:e30619.
- Kim D, et al. (2014) TopHat2: Accurate alignment of transcriptomes in the presence of insertions, deletions and gene fusions. *Genome Biol* 14:R36.
- Anders S, Pyl PT, Huber W (2015) HTSeq: A Python framework to work with high-throughput sequencing data. *Bioinform* 31:166–169.
- Anders S, Huber W (2010) Differential expression analysis for sequence count data. *Genome Biol* 11:R106.
- Atanas K, et al. (2011) ConsensusPathDB: Toward a more complete picture of cell biology. *Nucleic Acids Res* 39:D712–D717.
- Shoji-Kawata S, et al. (2013) Identification of a candidate therapeutic autophagy-inducing peptide. *Nature* 494:201–206.
- Pereira B, et al. (2016) The somatic mutation profiles of 2,433 breast cancers refines their genomic and transcriptomic landscapes. *Nat Commun* 7:11479.
- Benaglia T, Chaveau D, Hunter D, Young D (2009) mixtools: An R package for analyzing finite mixture models. *J Stat Softw* 32:1–29.
- Mermel CH, et al. (2011) GISTIC2.0 facilitates sensitive and confident localization of the targets of focal somatic copy-number alteration in human cancers. *Genome Biol* 12:R41.
